# Supplementary material
Source: PubMed Central journal article supplement (PMC2947284)

**Control  
siRNA**

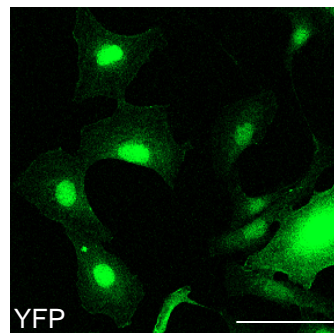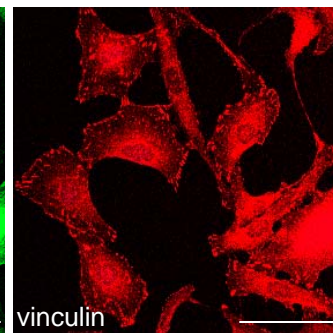

**VASP siRNA  
(1814-1834)**

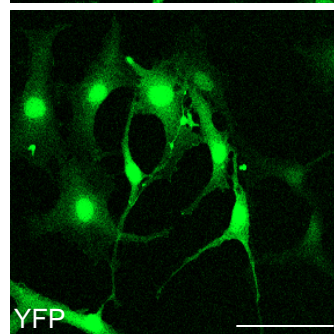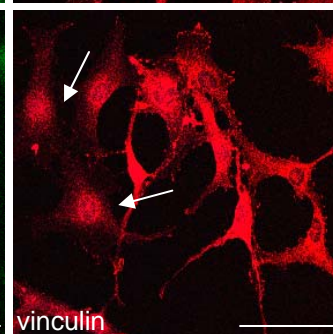

**Control  
siRNA**

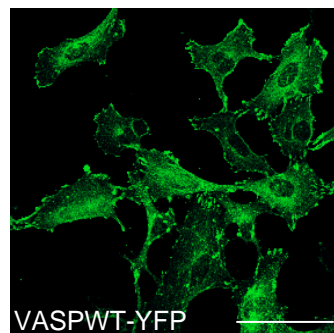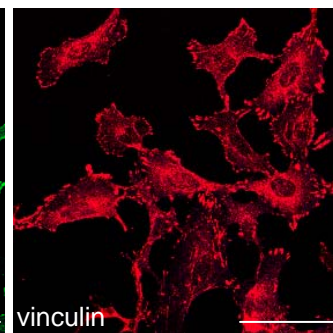

**VASP siRNA  
(1814-1834)**

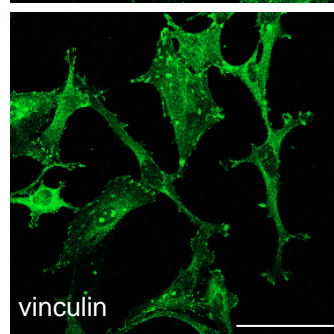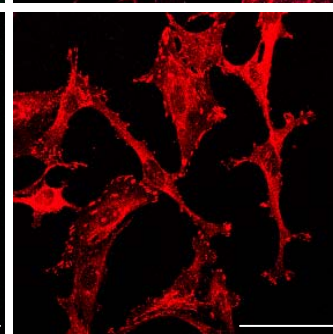

Supplement: mmc1.pdf [file mmc1.pdf]

SUPPL. FIG. 2 (SHAH)

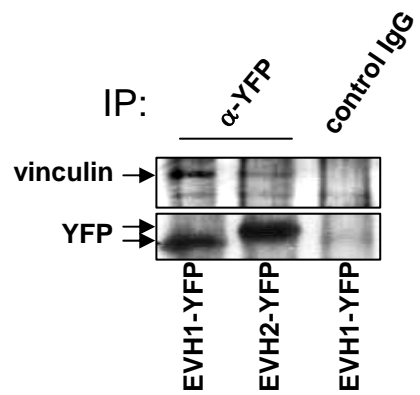

Supplement: mmc2.pdf [file mmc2.pdf]

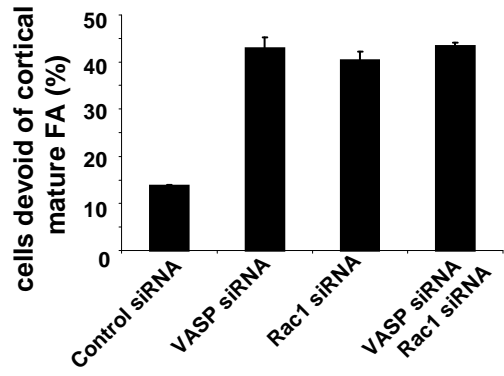

Supplement: mmc3.pdf [file mmc3.pdf]
